# Supplementary material
Source: PubMed Central journal article supplement (PMC4305532)
Supplement: NIHMS651263-supplement-1.pdf [file NIHMS651263-supplement-1.pdf]

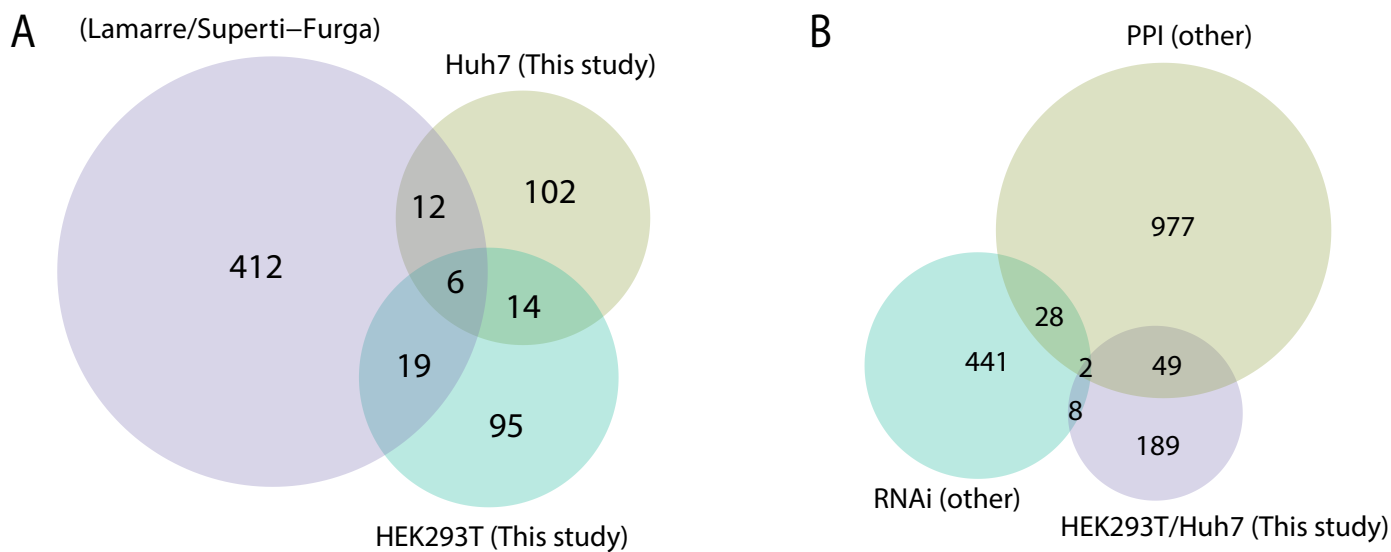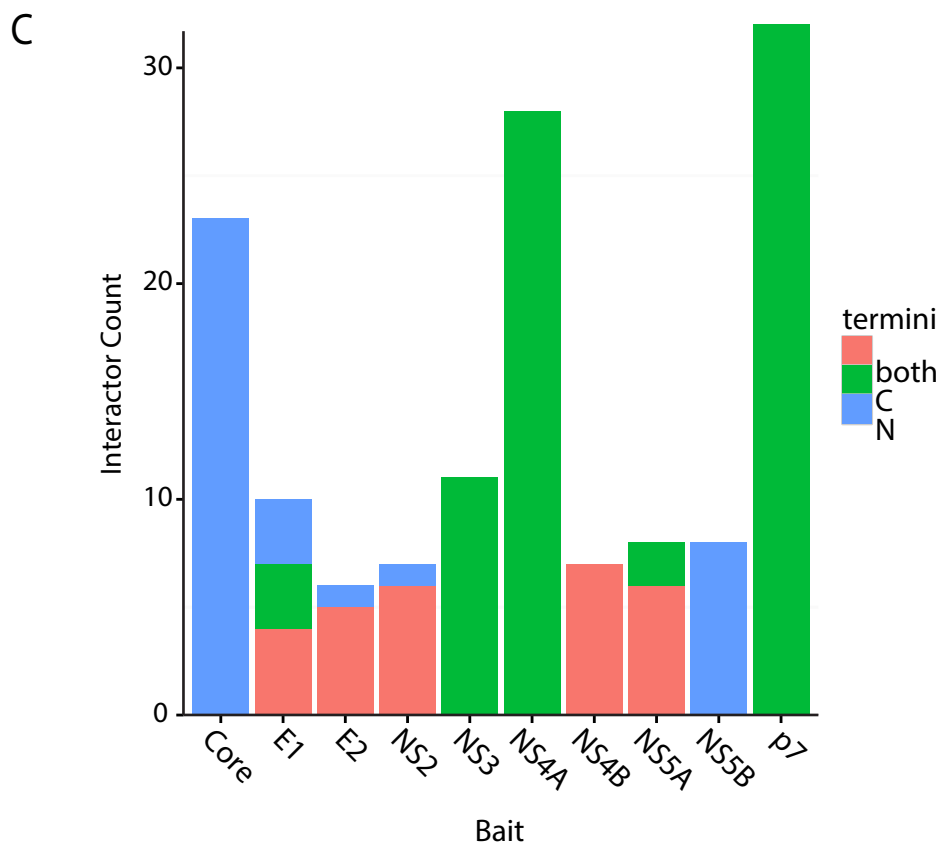

**D**

| Host Protein | Gene Name | Log <sub>2</sub> Fold-Change | p-value     |
|--------------|-----------|------------------------------|-------------|
| O00499       | BIN1      | 8.390990101                  | 0           |
| O94966       | USP19     | 6.51678174                   | 0           |
| Q04837       | SSBP1     | 3.394890103                  | 9.44E-09    |
| Q8NBS9       | TXNDC5    | 2.472638341                  | 0.427798468 |
| Q7RTV0       | PHF5A     | 0.432961511                  | 0.025103554 |

Figure S1

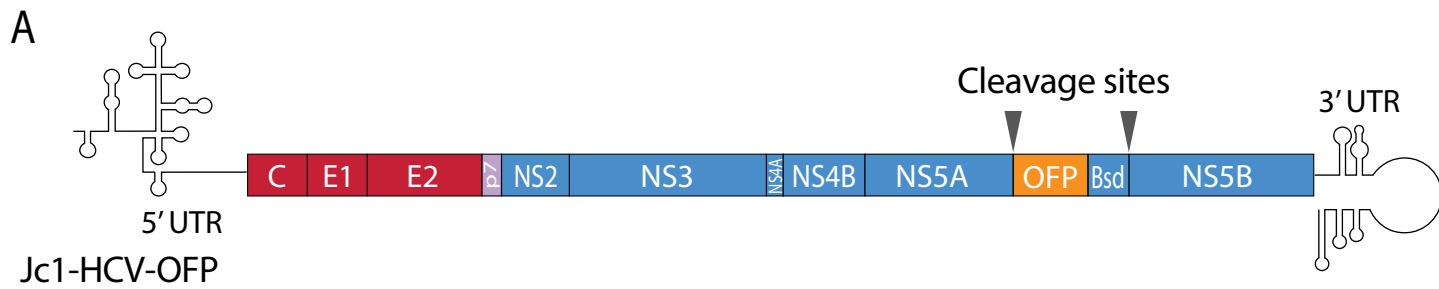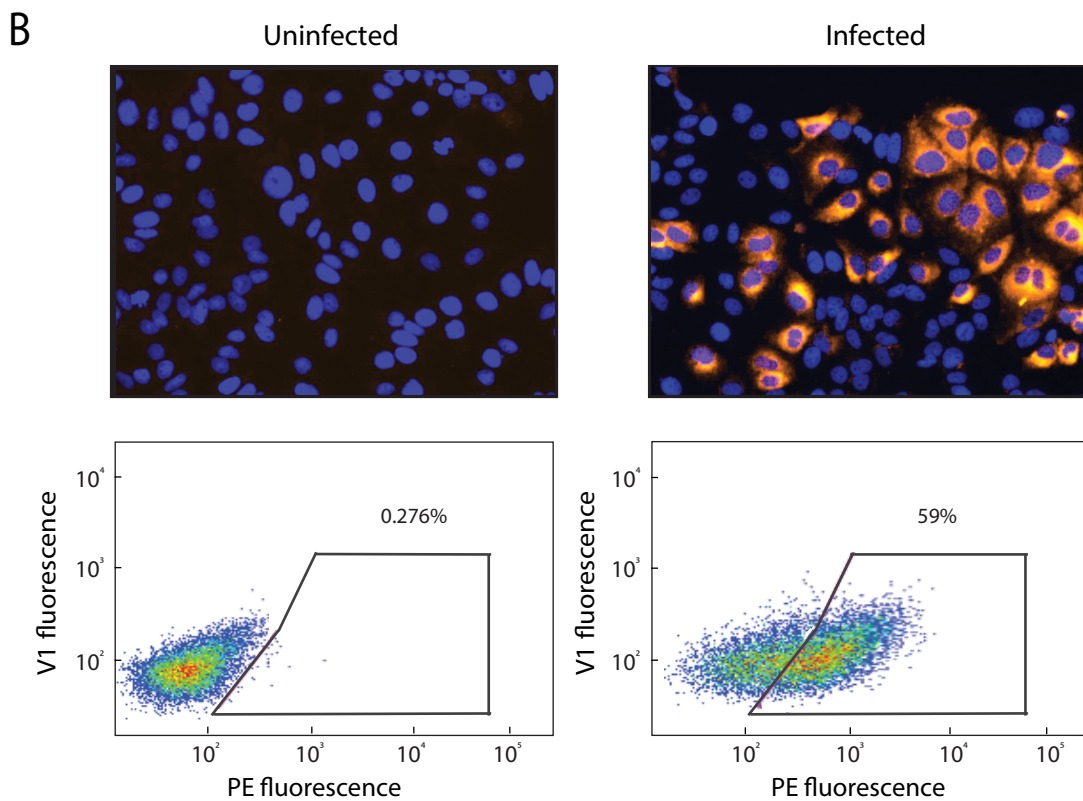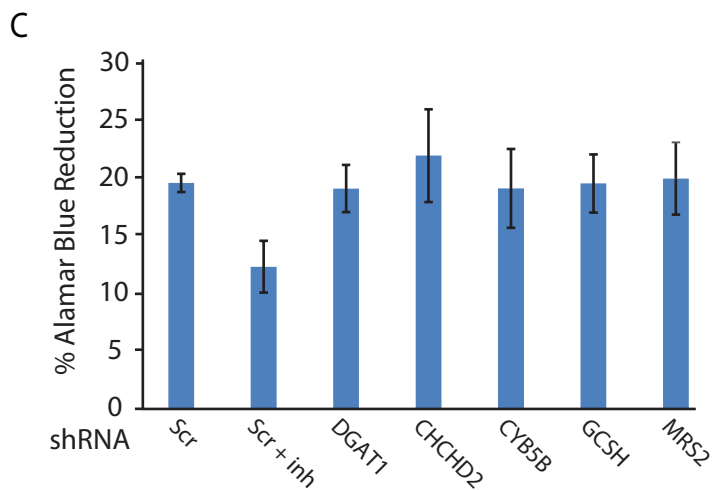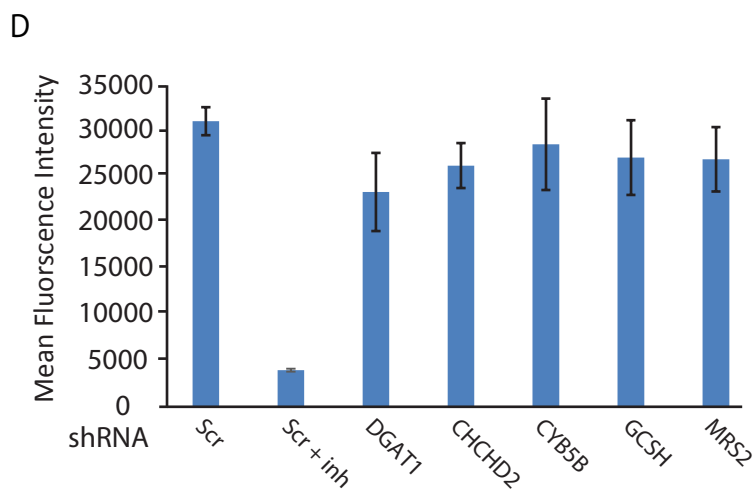

Figure S2

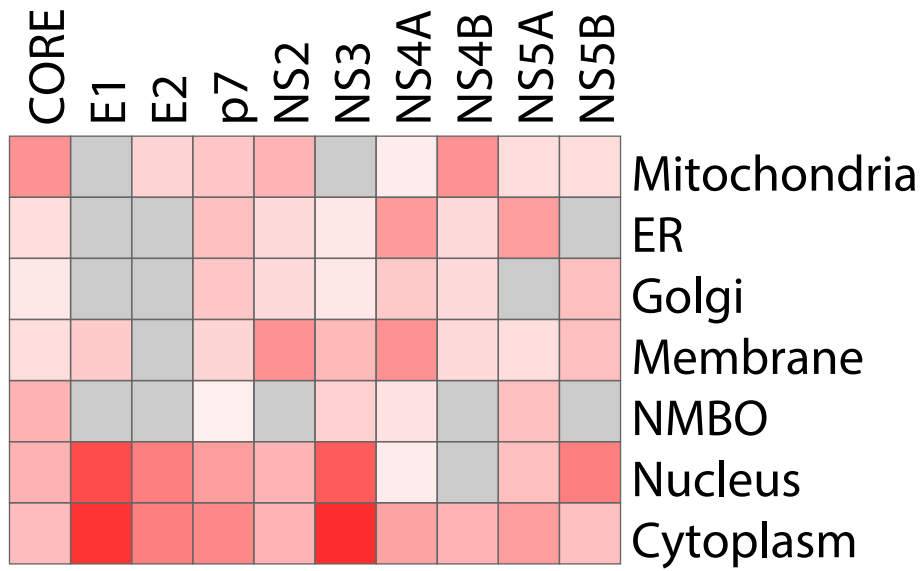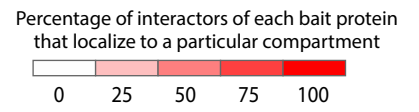

Figure S3

A

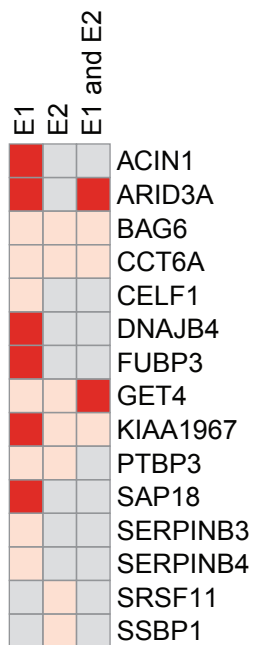

B

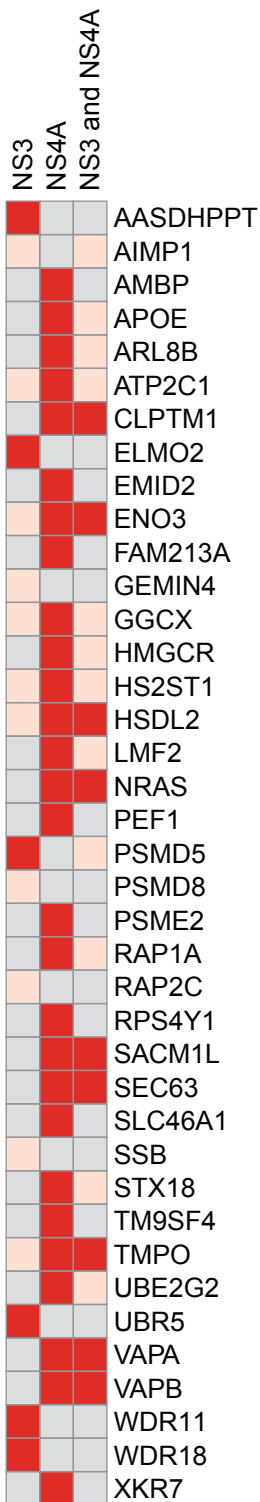

MiST Score

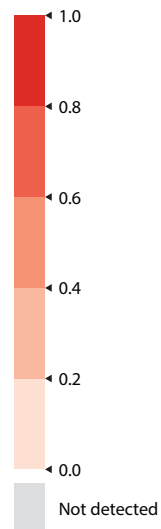

A

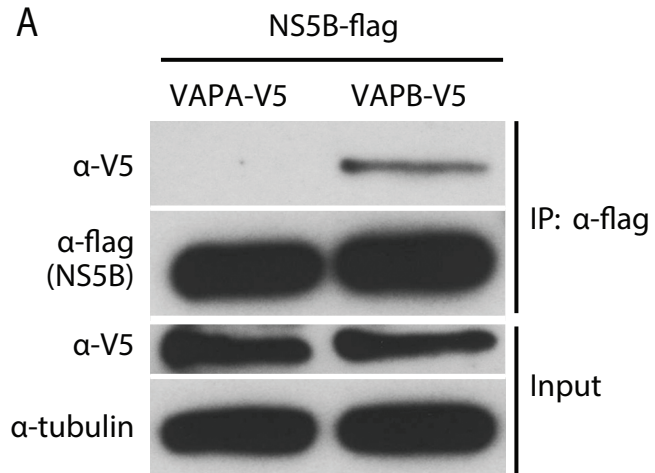

B

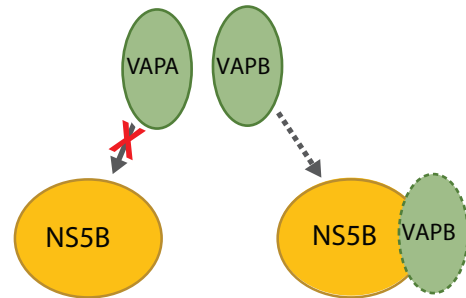

C

| HCV Protein | Log <sub>2</sub> Fold-Change | p-value  |
|-------------|------------------------------|----------|
| NS3         | 2.826                        | 0        |
| NS4A        | 6.302                        | 0.000382 |
| NS5A        | -0.432                       | 0.313976 |
| NS5B        | 1.818                        | 1.68E-13 |

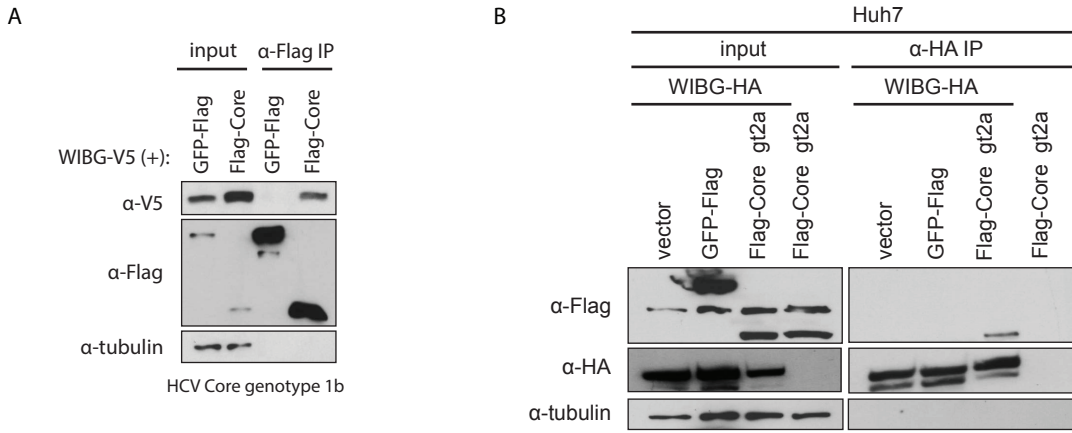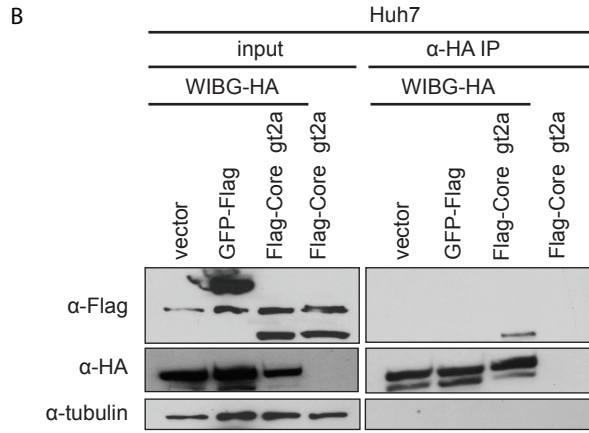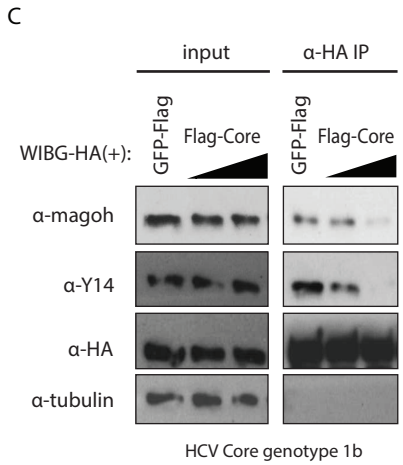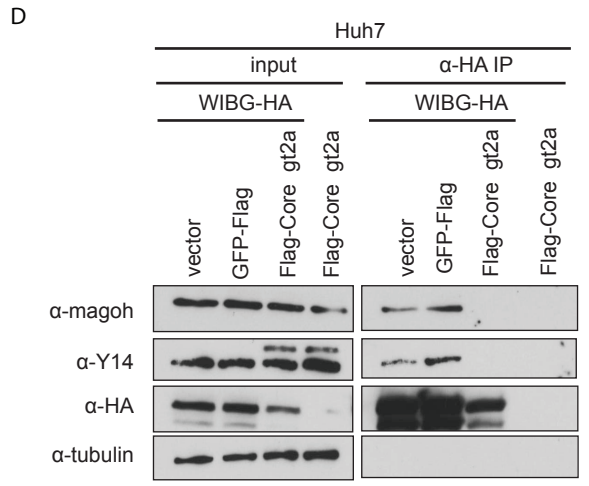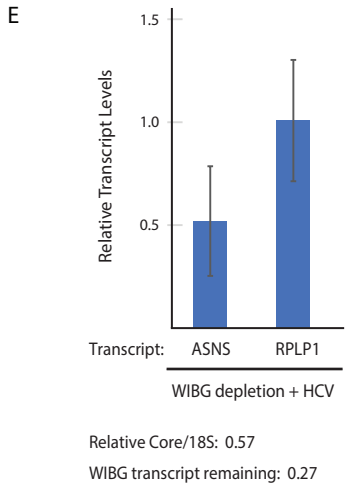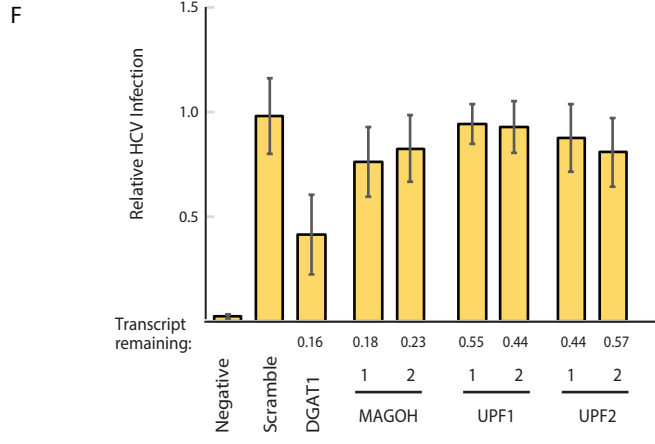

**HEK293T-HCV PPI Data**

| BAIT | PREY   | MIST        | COMPASS     | Gene Name     |
|------|--------|-------------|-------------|---------------|
| NS4B | P61326 | 0.685510596 | 6.040105355 | MAGOH, MAGOHA |
| NS4B | Q92900 | 0.194587717 | 3.890884815 | UPF1, RENT1   |
| Core | Q92900 | 0.240185763 | 4.159530831 | UPF1, RENT1   |
| E1   | Q92900 | 0.260419766 | 3.762437201 | UPF1, RENT1   |
| E1   | Q9BZ17 | 0.685510596 | 6.040105355 | UPF3B, RENT3B |
| E2   | Q92900 | 0.223165893 | 4.159530831 | UPF1, RENT1   |
| NS2  | Q92900 | 0.159068828 | 2.941232457 | UPF1, RENT1   |
| p7   | Q92900 | 0.581932085 | 6.452302517 | UPF1, RENT1   |
| Core | Q9Y5S9 | 0.78812827  | 20.03276316 | Y14, RBM8A    |

**Huh7-HCV PPI Data**

| BAIT | PREY   | MIST     | COMPASS     | gene_name   |
|------|--------|----------|-------------|-------------|
| E1   | Q9Y5S9 | 0.429458 | 3.983252866 | Y14, RBM8A  |
| E1   | Q92900 | 0.500968 | 4.225       | UPF1, RENT1 |
| E2   | Q92900 | 0.336855 | 2.802547948 | UPF1, RENT1 |
| NS3  | Q92900 | 0.43122  | 5.455760457 | UPF1, RENT1 |
| NS5A | Q92900 | 0.26951  | 3.787151723 | UPF1, RENT1 |
| NS5B | Q92900 | 0.239984 | 1.913548188 | UPF1, RENT1 |
| p7   | Q92900 | 0.196973 | 1.913548188 | UPF1, RENT1 |

Figure S6

## Supplemental Figure Legends

### Figure S1, related to Figures 1 and 3: Analysis of Interaction Data.

(A) A Venn diagram depicting the overlap of our refined interactome generated from Huh7 hepatoma cell data, our HEK293T data, and previously published AP/MS studies (Lamarre/Superti-Furga). (B) A Venn diagram depicting the overlap of our combined Huh7 and HEK293T data, previously published HCV-host PPI studies and RNAi studies. (C) An analysis of the overlap of host interactors identified with N or C-terminally tagged proteins. Due to protein expression concerns, there are cases in which only one (N or C-terminal) tag was used to generate interaction data. It is important to note that in most of these cases, the affinity tag is not located at the terminus that would be expected to disrupt membrane localization. For Core and NS5B, only N-terminally tagged HCV baits were used and for NS3, NS4A and p7 only C-terminally-tagged baits were used. (D) Mass spectrometry results of host proteins that co-immunoprecipitate with native NS5A in replicon-expressing Huh7.5 cells. Log<sub>2</sub> Fold-Change indicates the fold-enrichment of host proteins immunoprecipitated from HCV replicon-expressing cells as compared to the negative control, immunoprecipitations using the anti-NS5A antibody in Huh7.5 cells. The adjusted p-value is indicated and the data was obtained from three independent pull-downs

### Figure S2, related to Figure 2: RNAi Infection Assay and Viability of Cells Depleted of Select Mitochondrial Factors.

Infection Assay with HCV Reporter Virus. (A) A schematic of the HCV-OFP (mKO2) (Jc1/<sup>NS5AB-OFP-Bsd</sup>) reporter virus used in the shRNA infection screen. (B) The top panels show images (40X) of Huh7.5 cells with or without HCV-OFP infection. The bottom panels show the quantification by flow cytometry of HCV-infected or uninfected cells. The x-axis shows the PE (OFP) fluorescence

and the y-axis shows the V1 fluorescence, a negative control. (C, D) To analyze general cellular health, we used an alamar blue assay that results in the conversion of a dye to a fluorescent molecule when incubated with metabolically active cells. For assessment of mitochondrial viability we incubated cells with media containing CMXRos, a mitochondrial-specific fluorescent marker that is dependent on maintenance of the mitochondrial membrane potential. The percent reduction of alamar blue reagent, indicating the relative reducing capacity of the cells (C) or the mean fluorescence intensity of CMXRos, assessing mitochondrial membrane potential (D) is shown for cells in which the indicated transcripts are knocked down. Scramble shRNA is used as a negative control, while Scr + inh (CCCp, a disruptor of mitochondrial membrane potential) is used as a positive control for mitochondrial dysfunction. Shown are the average and standard deviation of three individual wells and the graphs are representative of two independent experiments.

**Figure S3, related to Figure 4: Cellular Compartment Localization of Host Interactors.** A heat map representing the percentage of interactors localized to the indicated cellular compartment for each bait protein. Cellular compartment localizations are not mutually exclusive, so each host protein may belong to multiple compartments.

**Figure S4, related to Figure 5: Interactions of HCV E1 and E2, or NS3 and NS4A Expressed Individually or Together and Host Proteins Interacting with NS5A in HCV Replicon-Expressing Cells.** (A) A heat map depicting the strength of interaction (MiST score) for all proteins interacting with E1 or E2 expressed individually on our refined map and the MiST score for those proteins with E1 and E2 expressed together. (B) A heat map depicting the strength of interaction (MiST score) for all proteins interacting with NS3 or NS4A expressed individually on our refined map and for those proteins with NS3 and NS4A expressed together.

**Figure S5, related to Figure 5: NS5B Interacts with VAPB but not VAPA by Co-Immunoprecipitation and Interaction of VAPA with Native HCV Proteins in Replicon-**



**Expressing Cells.** (A) Immunoprecipitations with  $\alpha$ -flag resin of Huh7 cell lysates expressing flag-tagged HCV NS5B and either V5-tagged VAPA or VAPB demonstrates that NS5B interacts with VAPB, but not VAPA. (B) A model visualizing the immunoprecipitation results from (A). (C) Mass spectrometry results of HCV proteins that co-immunoprecipitate with native VAPA in replicon-expressing Huh7.5 cells. Log<sub>2</sub> Fold-Change indicates the fold-enrichment of host proteins immunoprecipitated from HCV replicon-expressing cells as compared to the negative control. The adjusted p-value is indicated and the data was obtained from three independent pull-downs.

**Figure S6, related to Figure 6. Role of WIBG and NMD factors in HCV infection.** (A) and (C) Immunoprecipitations in HEK293T cells expressing the indicated constructs along with the flag-tagged HCV core from genotype 1b. (B) and (D) Immunoprecipitations in Huh7 hepatoma cells expressing the indicated constructs along with the flag-tagged HCV core from genotype 2a. (E) Relative levels of NMD substrate (ASNS) and control (RPLP1) transcripts upon WIBG depletion during HCV infection. Two independent shRNAs were used to deplete WIBG (average transcript remaining is listed below) in Huh7.5 cells and cells were infected with HCV-OFP (SI) for six days. Results shown are averaged transcript levels ( $\pm$ SD) normalized to HCV-infected cells containing scramble shRNA. HCV infection rates in WIBG-depleted cells are indicated by relative core/18S ratio as compared to HCV-infected cells containing scramble shRNA. (F) Results of the HCV infection following knock-down of NMD factors and controls. NMD factors as well as the scramble (negative) and DGAT1 (positive) controls targeted with shRNAs are indicated on the x-axis. Relative infection levels (normalized to cell density) are indicated on the y-axis. Results are shown as average ( $\pm$ SD) of a minimum of six experiments (Experimental Procedures, S5). (G) Table summarizing interactions between several HCV proteins and NMD factors present in the HEK293T-HCV and Huh7-HCV PPI data along with MIST and COMPASS scores.

## Supplemental Table Legends

**Table S1, related to Figures 1 and 3. Summary of all AP/MS used to generate interaction data.** The specific tagged HCV bait protein, cell type and mass spectrometry machine used for each sample is indicated. The summary provides the total number of immunoprecipitations analyzed for each cell type and machine type. LQT = Thermo Scientific LTQ XL linear ion trap mass spectrometer, VP = Thermo Scientific Velos Pro dual linear ion trap mass spectrometer

**Table S2, related to Figures 1 and 3. Scores of all interactors identified in HEK293T cells.** A summary of all COMPPASS scores and both iterations of MIST scores for all host proteins detected in HEK293T cells (worksheet 2). A description of columns is provided (worksheet 1).

**Table S3, related to Figures 1 and 3. Scores of all interactors identified in Huh7 cells.** A summary of all COMPPASS scores and both iterations of MIST scores for all host proteins detected in Huh7 cells (worksheet 2). A description of columns is provided (worksheet 1).

**Table S4, related to Figure 2. RNAi screen candidates and RNAi screen results.** The list of all interactors chosen for the RNAi screen, indicated by Uniprot and Gene Symbol (worksheet 1). The shRNA clones for each candidate are indicated by the TRC (The RNAi Consortium) number and were obtained from Sigma. Summary of the RNAi screen data generated for candidates with positive phenotypes (worksheet 2). Shown are results of the top two shRNA vectors for each host factor, including the average phenotype and standard deviation and the average transcript knock-down and standard deviation. Also indicated is the number of replicates performed for each shRNA construct.

**Table S5, related to Figures 1 and S2. Summary of overlap statistics.** Overlap of our study with previous RNAi and protein-protein interaction studies. Set description (worksheet 1) indicates published studies for which our dataset has overlap. Overlap general (worksheet 2) shows the numbers and p-values for the overlap between our study and previous HCV PPI or

RNAi studies. Overlap per method (worksheet 3) shows overlap between our PPI data and previous studies (AP/MS, yeast two hybrid (Y2H), and other literature). Overlap per method detail (worksheet 4) provides specific information about dataset overlaps for each method indicated.

**Table S6, related to Figure 3. Interactor protein domain and function enrichment analysis.**

We indicate the HCV bait protein, host prey proteins, average MIST score and average compass score associated with enriched function term (worksheet 1) or protein domain term (worksheet 2) in our Huh7 data. The number of preys for each term in our interactome and in our data set, as well as associated significance values are also indicated.

**Supplemental Experimental Procedures**

**Plasmids Used in This Study**

HCV ORFs were PCR-amplified from HCV JFH1 and cloned into the vector backbone pCDNA-TO (Invitrogen) carrying N- or C-terminal 3xFlag or 2xStrep-TagII sequences using SLIC cloning (Li and Elledge, 2012). Vectors expressing V5-tagged human proteins WIBG, VAPA, and VAPB were obtained from the Human Orfeome Collection (Yang et al., 2011). C-terminal HA-tagged WIBG was cloned into pCDNA3.1(+) using the NotI and XhoI restriction sites.

Plasmid source: Nevan J. Krogan

pcDNA4/TO N-term 2Xstrep - pcDNA4/TO (Invitrogen) carrying an N-terminal 2XstrepTagII sequence

pcDNA4/TO C-term 2Xstrep - pcDNA4/TO (Invitrogen) carrying an C-terminal 2XstrepTagII sequence

pcDNA4/TO N-term 3Xflag - pcDNA4/TO (Invitrogen) carrying an N-terminal 3Xflag sequence

pcDNA4/TO C-term 3Xflag - pcDNA4/TO (Invitrogen) carrying an C-terminal 3Xflag sequence

Plasmid source: This study

pHR301 - HCV 2A p7 C-terminal 2X strep

pHR302 - HCV 2A NS2 C-terminal 2X strep

pHR304 - HCV 2A E1 C-terminal 2X strep  
pHR308 - HCV 2A NS2 N-terminal 2X strep  
pHR309 - HCV 2A NS3 C-terminal 2X strep  
pHR310 - HCV 2A NS4A C-terminal 2X strep  
pHR311 - HCV 2A NS4A N-terminal 2X strep  
pHR312 - HCV 2A NS5A C-terminal 2X strep  
pHR313 - HCV 2A NS4B N-terminal 3X flag  
pHR314 - HCV 2A p7 N-terminal 3X flag  
pHR315 - HCV 2A NS2 N-terminal 3X flag  
pHR316 - HCV 2A E1 N-terminal 3X flag  
pHR317 - HCV 2A NS4A N-terminal 3X flag  
pHR318 - HCV 2A E2 N-terminal 3X flag  
pHR319 - HCV 2A Core N-terminal 3X flag  
pHR320 - HCV 2A NS5A N-terminal 3X flag  
pHR321 - HCV 2A NS2 C-terminal 3X flag  
pHR322 - HCV 2A NS4A C-terminal 3X flag  
pHR323 - HCV 2A NS4B C-terminal 3X flag  
pHR324 - HCV 2A E1 C-terminal 3X flag  
pHR325 - HCV 2A p7 C-terminal 3X flag  
pHR326 - HCV 2A NS4B C-terminal 2X strep  
pHR327 - HCV 2A NS4B N-terminal 2X strep  
pHR328 - HCV 2A NS5A N-terminal 2X strep  
pHR329 - HCV 2A E2 C-terminal 3X flag  
pHR330 - HCV 2A NS5A C-terminal 3X flag  
pHR331 - HCV 2A NS3 C-terminal 3X flag  
pHR350 - HCV 2A NS5B (codon optimized by GenScript) N-terminal 3X flag  
WIBG-HA – pCDNA3.1(+) Hs\_WIBG C-terminal 1X HA tag

Plasmid source: CCSB Human ORFeome Collection v8.1 (Thermo Scientific)

VAPA-V5 - Hs\_VAPA in pLX304 (ccsbBroad304\_11349)

VAPB-V5 - Hs\_VAPB in pLX304 (ccsbBroad304\_11349)

WIBG-V5 - Hs\_WIBG in pLX304 (ccsbBroad304\_023)

| <b>Primers for Cloning Vectors Used in This Study</b> |                                                 |                                                |
|-------------------------------------------------------|-------------------------------------------------|------------------------------------------------|
| <b>Construct</b>                                      | <b>Forward Primer</b>                           | <b>Reverse Primer</b>                          |
| HCV 2A p7 C-terminal 2X strep                         | CAGTGTGGTGGAAATTCGCCGCCATGGCATTGGAGAAGTTGGTCTGT | CTCCCTCGAGCGGCCCGCACGGCATAAGCCTGCCGGGGC        |
| HCV 2A NS2 C-terminal 2X strep                        | CAGTGTGGTGGAAATTCGCCGCCATGTATGACGCACCTGTGCACGG  | CTCCCTCGAGCGGCCCGCACAAAGGAGCTTCACCCCTTGG       |
| HCV 2A E1 C-terminal 2X strep                         | CTCCCTCGAGCGGCCCGCACCGCGTCCACCACAGCGGCCA        | CAGTGTGGTGGAAATTCGCCGCCATGGCCCAGGTGAAGAATACCAG |
| HCV 2A NS2 N-terminal 2X strep                        | CCAGTTCGAGAAGGGGGCGGCCGCTTATGACGCACCTGTGCACGG   | GGTTTAAACGGGCCCTCTAGATAAGGAGCTTCCACCCCTTGG     |
| HCV 2A NS3 C-terminal 2X strep                        | CAGTGTGGTGGAAATTCGCCGCCATGGCTCCCATCACTGCTTATGC  | CTCCCTCGAGCGGCCCGCACGGTCATGACCTCAAGGTCAG       |
| HCV 2A NS4A C-terminal 2X strep                       | CAGTGTGGTGGAAATTCGCCGCCATGAGCACGTGGGTCCTAGCTGG  | CTCCCTCGAGCGGCCCGCACGCATTCCCTCCATCTCATCAA      |
| HCV 2A NS4A N-terminal 2X strep                       | CCAGTTCGAGAAGGGGGCGGCCGCTAGCACGTGGGTCCTAGCTGG   | GGTTTAAACGGGCCCTCTAGATGCATTCCCTCATCTCATCAA     |
| HCV 2A NS5A C-terminal 2X strep                       | CAGTGTGGTGGAAATTCGCCGCCATGTCCGGATCCTGGCTCCGCGA  | CTCCCTCGAGCGGCCCGCACGCAGCACACGGTGGTATCGT       |
| HCV 2A NS4B N-terminal 3X flag                        | CCAGTTCGAGAAGGGGGCGGCCGCTGCCTCTAGGGCGGCTCTCAT   | GGTTTAAACGGGCCCTCTAGATGCATGGGATGGGGCAGTCCT     |
| HCV 2A p7 N-terminal 3X flag                          | CCAGTTCGAGAAGGGGGCGGCCGCTGCATGGAGAAGTTGGTCTGT   | GGTTTAAACGGGCCCTCTAGATGGCATAAGCCTGCCGGGGCA     |
| HCV 2A NS2 N-terminal 3X flag                         | CCAGTTCGAGAAGGGGGCGGCCGCTTATGACGCACCTGTGCACGG   | GGTTTAAACGGGCCCTCTAGATAAGGAGCTTCCACCCCTTGG     |
| HCV 2A E1 N-terminal 3X flag                          | CCAGTTCGAGAAGGGGGCGGCCGCTGCCAGGTGAAGAATACCAG    | GGTTTAAACGGGCCCTCTAGATCGCGTCCACCCAGCGGCCA      |
| HCV 2A NS4A N-terminal 3X flag                        | CCAGTTCGAGAAGGGGGCGGCCGCTAGCACGTGGGTCCTAGCTGG   | GGTTTAAACGGGCCCTCTAGATGCATTCCCTCATCTCATCAA     |
| HCV 2A E2 N-terminal 3X flag                          | CCAGTTCGAGAAGGGGGCGGCCGCTGGCACACCACCGTTGGAGG    | GGTTTAAACGGGCCCTCTAGATTGCTTCGGCCTGGCCCAACA     |
| HCV 2A Core N-terminal 3X flag                        | CCAGTTCGAGAAGGGGGCGGCCGCTAGCAAAATCCTAAACCTCA    | GGTTTAAACGGGCCCTCTAGATAGCAGAGACCGGAACGGTGA     |
| HCV 2A NS5A N-terminal 3X flag                        | CCAGTTCGAGAAGGGGGCGGCCGCTCCGGATCCTGGCTCCGCGA    | GGTTTAAACGGGCCCTCTAGATGCAGCACACGGTGGTATCGT     |
| HCV 2A NS2 C-terminal 3X flag                         | CAGTGTGGTGGAAATTCGCCGCCATGTATGACGCACCTGTGCACGG  | CTCCCTCGAGCGGCCCGCACAAAGGAGCTTCACCCCTTGG       |
| HCV 2A NS4A C-terminal 3X flag                        | CAGTGTGGTGGAAATTCGCCGCCATGAGCACGTGGGTCCTAGCTGG  | CTCCCTCGAGCGGCCCGCACGCATTCCCTCCATCTCATCAA      |

|                                                               |                                                    |                                                                                  |
|---------------------------------------------------------------|----------------------------------------------------|----------------------------------------------------------------------------------|
| HCV 2A NS4B C-terminal 3X flag                                | CAGTGTGGTGGAAATTCGCCGCCATGGCCTC<br>TAGGGCGGCTCTCAT | CTCCCTCGAGCGGCCCGCACGCATGGGAT<br>GGGGCAGTCCT                                     |
| HCV 2A E1 C-terminal 3X flag                                  | CTCCCTCGAGCGGCCCGCACCGCGTCCACC<br>CCAGCGGCCA       | CAGTGTGGTGGAAATTCGCCGCCATGGCCC<br>AGGTGAAGAATACCAG                               |
| HCV 2A p7 C-terminal 3X flag                                  | CAGTGTGGTGGAAATTCGCCGCCATGGCATT<br>GGAGAAGTTGGTCGT | CTCCCTCGAGCGGCCCGCACGGCATAAGCC<br>TGCCGGGGC                                      |
| HCV 2A NS4B C-terminal 2X strep                               | CAGTGTGGTGGAAATTCGCCGCCATGGCCTC<br>TAGGGCGGCTCTCAT | CTCCCTCGAGCGGCCCGCACGCATGGGAT<br>GGGGCAGTCCT                                     |
| HCV 2A NS4B N-terminal 2X strep                               | CCAGTTCGAGAAGGGGGCGGCCGCTGCCT<br>CTAGGGCGGCTCTCAT  | GGTTTAAACGGGCCCTCTAGATGCATGGG<br>ATGGGGCAGTCCT                                   |
| HCV 2A NS5A N-terminal 2X strep                               | CCAGTTCGAGAAGGGGGCGGCCGCTTCCG<br>GATCCTGGCTCCGCGA  | GGTTTAAACGGGCCCTCTAGATGCAGCAC<br>ACGGTGGTATCGT                                   |
| HCV 2A E2 C-terminal 3X flag                                  | CTCCCTCGAGCGGCCCGCACTGCTTCGGCC<br>TGGCCCAACA       | CAGTGTGGTGGAAATTCGCCGCCATGGGCA<br>CCACCACCGTTGGAGG                               |
| HCV 2A NS5A C-terminal 3X flag                                | CAGTGTGGTGGAAATTCGCCGCCATGTCCGG<br>ATCCTGGCTCCGCGA | CTCCCTCGAGCGGCCCGCACGCAGCACAC<br>GGTGGTATCGT                                     |
| HCV 2A NS3 C-terminal 3X flag                                 | CAGTGTGGTGGAAATTCGCCGCCATGGCTCC<br>CATCACTGCTTATGC | CTCCCTCGAGCGGCCCGCACGGTCATGACC<br>TCAAGGTCAG                                     |
| HCV 2A NS5B (codon optimized by GenScript) N-terminal 3X flag | TTGCGGCCGCTATGTCAATGTCATACTCCT<br>G                | TTTCTAGATTAGCGGGCAGGCAGCAGAA                                                     |
| Hs_WIBG-HA                                                    | CGGCGGCCGCATGGAAGCTGCCGGCAGCC                      | GCCTCGAGTCACGCATAGTCAGGTACATC<br>GTATGGGTAAGCCATGAGGCCTAACTCCA<br>AGTCCTCTAACTCC |

## Amino Acid Sequences of Proteins Used in This Study

### core HCV Genotype 2A

STNPKPQRKTKRNTNRRPEDVKFPGGGQIVGGVYLLPRRGPRLGVRTTRKTSERSQPRGRRQ  
PIPKDRRSTGKAWGKPGRPWPLYGNEGLWAGWLLSPRGSRPSWGPTDPRHRSRNVGKVI  
DTLTCGFADLMGYIPVVGAPLSGAARAVAHGVRVLEDGVNYATGNLPGFPFSIFLLALLSCITVP  
VSA

### E1 HCV Genotype 2A

QVKNTSSSYMVTNDCSNDISITWQLEAAVLHVPGCVPCERVGNTSRCWVPVSPNMAVRQPGA  
LTQGLRTHIDMVMSATFCSALYVGDLCGGVMLAAQVFIVSPQYHWFVQECNCSIYPGTITGH  
RMAWDMMMNSPTATMILAYVMRVPEVIIDIVSGAHWGVFMFLAYFSMQGAWAKVIVILLAA  
GVDA

### E2 HCV Genotype 2A

GTTTVGGAVARSTNVIAGVFSHGPPQNIQLINTNGSWHINRTALNCNDSLNTGFLAALFYTNRF  
NSSGCPGRLSACRNIEAFRIGWGTLQYEDNVTNPEDMRPYCWHYPPKPCGVVPARSVCGPV  
YCFTPSPVVVGTTDRRGVPTYTWGENETDVLLNSTRPPQGSWFGCTWMNSTGFTKTCGAP

PCRTRADFNASTDLLCPTDCFRKHPDATYIKCGSGPWLTpkclvhypyrllwhypctvnftifki  
RMYVGGVEHRLTAACNFRGDRCDLEDRDRSQLSPLLHSTTEWAILPCTYSDLPALSTGLLHL  
HQNIVDVQYMYGLSPAITYVVRWEWVLLFLLADARVCACLWMLILLGQAEA

p7 HCV Genotype 2A

ALEKLVVLAHAASAANCHGLLYFAIFFVAAWHIRGRVVPLTTYCLTGLWPFCLLLMALPRQAYA

NS2 HCV Genotype 2A

YDAPVHGQIGVGLLILITLFTLTPGYKTLLGQCLWWLCYLLTLGEAMIQEWVPPMQVRGGRDGI  
AWAVTIFCPGVVFDITKWLLALLGPAYLLRAALTHVPYFVRAHALIRVCALVKQLAGGRYVQVAL  
LALGRWTGTYYDHLTPMSDWAASGLRDLAVAVEPIIFSPMEKKVIVWGAETAACGDILHGLPV  
SARLGQEILLGPADGYTSKGWKL

NS3 HCV Genotype 2A

APITAYAQQTRGLLGAIVVSMTGRDRTEQAGEVQILSTVSQSFLGTTISGVLWTVYHGAGNKT  
AGLRGPVTQMYSSAEGDLVGWPSPPGKTSLEPCKCGAVDLYLVTRNADVIPARRRGDKRGAL  
LSPRPISLTKGSSGGPVLCPRGHVVGFRFAAVCSRGVAKSIDFIPVETLDVVTRSPFTSDNSTPP  
AVPQTYQVGYLHAPTGSKSTKVPVAYAAQGYKVLVLPNSVAATLGFGAYLSKAHGINPNIRT  
GVRTVMTGEAITYSTYGKFLADGGCASGAYDIIICDECHAVDATSILGIGTVLDQAETAGVRLTVL  
ATATPPGSVTTTPHDIEEVGLGREGEIPFYGRAIPLSCIKGGRHLIFCHSKKKCEDELAALRGMG  
LNAVAYYRGLDVSIIPAQGDVVVATDALMTGYTGDFDSVIDCNVAVTQAVDFSLDPTFTITTQT  
VPQDAVSRSRQRRTGRGRQGTYYRYVSTGERASGMFDSVVLCECYDAGAAWYDLTPAETTV  
RLRAYFNTPLPVCQDHLFEWAVFTGLTHIDAHFLSQTKQAGENFAYLVAYQATVCARAKAP  
PPSWDAMWKCLARLKPTLAGPTPLLYRLGPITNEVTLTHPGTKYIATCMQADLEVMT

NS4A HCV Genotype 2A

STWVLAGGVLAAVAAYCLATGCVSIIGRLHVNQRVVVAPDKEVLYEAFDEMEEC

NS4B HCV Genotype 2A

ASRAALIEEGQRIAEMLKSKIQGLLQQASKQAQDIQPAMQASWPKVEQFWARHMWNFISGIQY  
LAGLSTLPGNPAVASMMAFSAALTSPLSTSTTILLNIMGGWLASQIAPPAGATGFVVSGLVGAA  
VGSIGLGKVLVDILAGYGAGISGALVAFKIMSGEKPSMEDVINLLPGILSPGALVVGVICAILRRH  
VGPGEAVQWMNRLIAFASRGNHVAPTHYVTESDASQRVTQLLGSLLTITSLRRLHNWITEDC  
PIPC

NS5A HCV Genotype 2A

SGSWLRDWDVWCTILTDFKNWLTSKLFKLPGLPFISCQKGYKGVWAGTGIMTTRCPCGANI  
SGNVRLGSMRITGPKTCMNTWQGTFFPINCYTEGQCAPKPPTNYKTAIWRVAASEYAEVTQH  
SYSYVTGLTTDNLKIPCQLPSPEFFSWVDGVQIHRFAPTPKPFRRDEVSFVGLNSYAVGSQ  
CEPEPDADVLRSMILTDPHITAETAARRLARGSPPEASSSVSLSAPSLRATCTTHSNTYDV  
DMVDANLLMEGGVAQTEPESRVPVLDLFLEPMAEEESDLEPSIPSECMLPRSGFPRALPAWAR  
PDYNPPLVESWRRPDYQPPTVAGCALPPPCKAPTPPRRRRRTVGLSESTISEALQQLAIKTFG  
QPPSSGDAGSSTGAGAAESGGPTSPGEPAPSETGSASSMPPELEGEPGDPDLESDQVELQPP  
PQGGGVAPGSGSGSWSTCSEEDDTTVCC

NS5B HCV Genotype 2A

SMSYSWTGALITPCSPEEEKLPINPLSNLLRYHNKVYCTTSKSASQRAKKVTFDRTQVLDAH  
DSVLKDIKLAASKVSARLLTLEEACQLTPPHSARSKYGFGAKEVRSLSGRAVNHKSVWKDLE  
DPQTPIPTTIMAKNEVFCVDPKAGGKPPARLIVYPDLGVRVCEKMALYDITQKLPQAVMGASYG  
FQYSPAQRVEYLLKAWAEKKDPMGFSYDTRCFDSTVTERDIRTEESIQACSLPEEARTAIHSL  
TERLYVGGPMFNSKGQTCGYRRCRASGVLTTSMGNTITCYVKALAACKAAGIVAPTMLVCGD  
DLVVISQSGTEEDERNLRAFTEAMTRYSAPPGDPPRPEYDLELITSCSSNVSVALGPRGRRR  
YYLTRDPTTPLARA AWETVRHSPINSWLGNIQYAPTIWVRMVLMTTHFFSILMVQDTLDQNLNF  
EMYGSVYSVNPLDLPALIERLHGLDAFSMHTYSHHELTRVASALRKL GAPPLRVWKSRRARAVR  
ASLISRGGKAAVCGRYLFNWAVKTKLKLTPPEARLLDLSSWFTVGAGGGDIFHSVSRARPRSL  
LFGLLLLFVGVGLFLLPAR

#### Hs\_VAPA

MAKHEQILVLDPPTDLKFKGPFTDVVTTNLKLRNPSDRKVCFKVKTAPRRYCVRPNNGIIDPG  
STVTVSVMLQPFYDPNEKSKHKFMVQTFAPNTSDMEAVWKEAKPDELMDSKLRCVFEMP  
NENDKLNDEPSKAVPLNASKQDGPMPKPHSVSLNDTETRKLMEECKRLQGEMMKLSEENR  
HLRDEGLRLRKAHSDKPGSTSTASFRDNVTSPLPSLLVIAAIFIGFFLGKFIL

#### Hs\_VAPB

MAKVEQVLSLEPQHELKFRGPFTDVVTTNLKLGNPTRDNRVCFKVKTTAPRRYCVRPNNGIIDAG  
ASINVSVMMLQPFYDPNEKSKHKFMVQSMFAPTDTSMEAVWKEAKPEDLMDSKLRCVFELP  
AENDKPHDVEINKIISTTASKTETPIVSKSLSSSLDDTEVKKVMEECKRLQGEVQRLREENKQFK  
EEDGLRMRKTVQSNPISALAPTGKEEGLSTRLLALVVLFFIVGVIIKIAL

#### Hs\_WIBG

MEAAGSPAATETGKYIASTQRPDGTWRKQRRVKEGYVPQEEVPVYENKYVKFFKSKPELPPG  
LSPEATAPVTPSRPEGGEPGLSKTAKRNLKRKEKRRQQQEKGEAEALSRTLDKVSLEETAQLP  
SAPQGSRAAPTAASDQPSAATTEKAKKIKNLKKLQRQVEELQQRIQAGEVSQPSKEQLEKLA  
RRRALEEELEDLELGL

### **Affinity Purification for Mass Spectrometry**

Cells were lysed in IP buffer with detergent (150mM NaCl, 50mM Tris pH 7.4, 1mM EDTA, 0.5% NP-40 substitute) for 30 min at 4°C and passed 10 times through a G23 needle. Clarified lysates were affinity-purified with Streptactin Superflow Resin for strep-tagged proteins (IBA, 2-1206-025) or Anti-flag M2 affinity gel for flag-tagged proteins (Sigma, A2220) at 4°C overnight. For immunoprecipitations of native proteins in replicon-expressing cells, antibodies recognizing VAPA or HCV NS5A were incubated with lysates at 4°C overnight. To precipitate antibody-protein complexes, we added 50ul of a Protein A/G agarose slurry. Resin was washed four times in IP



buffer with detergent, followed by two washes in IP buffer without detergent (150mM NaCl, 50mM Tris pH 7.4, 1mM EDTA). Resin was resuspended in 40µl IP buffer without detergent containing 2mM biotin for strep-tagged proteins or 0.1 mg/ml 3X flag peptide (Sigma, F4799) and 0.05% Rapigest (Waters) for flag-tagged proteins at 4°C for 30 minutes, with agitation. We reserved 20 µl of the for analysis by SDS-PAGE followed by either western blotting using infrared detection (Li-Cor Biosciences) or silver staining (Thermo Scientific, 24600).

### **Sample Preparation for Mass Spectrometry**

Purified proteins eluates were digested with trypsin for LC-MS/MS analysis. Samples were denatured and reduced in 2M urea, 10 mM NH<sub>4</sub>HCO<sub>3</sub>, 2 mM DTT for 30 min at 60C, then alkylated with 2 mM iodoacetamide for 45 min at room temperature. Trypsin (Promega) was added at a 1:100 enzyme:substrate ratio and digested overnight at 37C. Following digestion, samples were concentrated using C18 ZipTips (Millipore) according to the manufacturer's specifications. Desalted samples were evaporated to dryness and resuspended in 0.1% formic acid for mass spectrometry analysis.

### **Mass Spectrometry**

Digested peptide mixtures were analyzed by LC-MS/MS on either a Thermo Scientific LTQ XL linear ion trap mass spectrometer or a Thermo Scientific Velos Pro dual linear ion trap mass spectrometer. The LTQ XL system was equipped with a LC Packings UltiMate HPLC with an analytical column (10 cm x 75 µm I.D. packed with ReproSil Pur C18 AQ 5 µm particles) and the Velos Pro system was equipped with a Proxeon Easy-nLC HPLC with a pre-column (2 cm x 100 µm I.D. packed with ReproSil Pur C18 AQ 5 µm particles) and an analytical column (10 cm x 75 µm I.D. packed with ReproSil Pur C18 AQ 3 µm particles). Both systems delivered a gradient from 5% to 30% ACN in 0.1% formic acid over one hour. Both mass spectrometers collected data in a data-dependent fashion. The LTQ XL collected one full scan followed by 10 collision-induced

dissociation MS/MS scans of the 10 most intense peaks from the full scan. The Velos Pro collected one full scan followed by 20 collision-induced dissociation MS/MS scans of the 20 most intense peaks from the full scan. Dynamic exclusion was enabled on both systems for 30 seconds with a repeat count of 1. Data were searched against a database containing SwissProt Human protein sequences (downloaded March 6, 2012) and HCV sequences, concatenated to a decoy database where each sequence was randomized in order to estimate the false positive rate. The searches considered a precursor mass tolerance of 1 Da and fragment ion tolerances of 0.8 da, and considered variable modifications for protein N-terminal acetylation, protein N-terminal acetylation and oxidation, glutamine to pyroglutamate conversion for peptide N-terminal glutamine residues, protein N-terminal methionine loss, protein N-terminal acetylation and methionine loss, and methionine oxidation, and constant modification for carbamidomethyl cysteine. The resulting raw data was matched to protein sequences by the Protein Prospector algorithm. Data were searched against a database containing SwissProt Human protein sequences (downloaded March 6, 2012) and HCV sequences. Prospector data was filtered using a maximum protein expectation value of 0.01 and a maximum peptide expectation value of 0.05.

### **Native VAPA and HCV NS5A Mass Spectrometry and Analysis**

Purified proteins were digested as described above. Digested peptide mixtures were analyzed by LC-MS/MS on a Thermo Scientific LTQ Orbitrap Elite mass spectrometry system equipped with a Proxeon Easy nLC 1000 ultra high-pressure liquid chromatography and autosampler system. Samples were injected onto a C18 column (25 cm x 75  $\mu$ m I.D. packed with ReproSil Pur C18 AQ 1.9 $\mu$ m particles) in 0.1% formic acid and then separated with a one-hour gradient from 5% to 30% ACN in 0.1% formic acid at a flow rate of 300 nl/min. The mass spectrometer collected data in a data-dependent fashion, collecting one full scan in the Orbitrap at 120,000 resolution followed by 20 collision-induced dissociation MS/MS scans in the dual linear ion trap for the 20 most intense peaks from the full scan. Dynamic exclusion was enabled for 30 seconds with a repeat count of

1. Charge state screening was employed to reject analysis of singly charged species or species for which a charge could not be assigned. The raw data was matched to protein sequences by the MaxQuant algorithm (version 1.3.0). Data were searched against a database containing SwissProt Human and hepatitis C virus protein sequences, concatenated to a decoy database where each sequence was randomized in order to estimate the false positive rate. Variable modifications were allowed for methionine oxidation and protein N-terminus acetylation. A fixed modification was indicated for cysteine carbamidomethylation. Full trypsin specificity was required. The first search was performed with a mass accuracy of  $\pm 20$  parts per million and the main search was performed with a mass accuracy of  $\pm 6$  parts per million. A maximum of 5 modifications were allowed per peptide. A maximum of 2 missed cleavages were allowed. The maximum charge allowed was 7+. Individual peptide mass tolerances were allowed. For MS/MS matching, a mass tolerance of 0.5 Da was allowed and the top 6 peaks per 100 Da were analyzed. MS/MS matching was allowed for higher charge states, water and ammonia loss events. The data were filtered to obtain a peptide, protein, and site-level false discovery rate of 0.01. The minimum peptide length was 7 amino acids. Results were matched between runs with a time window of 2 minutes for technical duplicates.

The data was analyzed using the MSstats package (Choi et al., 2014) in R/Bioconductor (v.2.3.4). To prepare the data for analysis, the set of identified peptides by MaxQuant (Cox and Mann, 2008) was filtered for contaminants and false positives from the search. The affinity purification and control sample intensities were then log<sub>2</sub>-transformed and normalized using GAPDH and MYH9 as global standards across runs. Missing intensity values for peptides were imputed by using the mean minimum intensity across all MS runs. The significance of the fold-change for every protein between pull-down and control was tested using mixed effect models, implemented in the group comparison function of MSstats, with no equal feature variance and restricted scope of technical and biological replication. Statistically significant interaction partners were selected

by filtering results on a log<sub>2</sub>-fold-change > 2 and adjusted p-value (or False Discovery Rate) < 0.05.

### **Interactome scoring and visualization**

The first iteration of the HCV interactome was compiled through selecting bait-prey pairs with a MIST score > .70, computed with the previously published feature weights for reproducibility (.31), abundance (.01) and specificity (.68) (Jager et al., 2011), or a top 5% Comppass WD score per bait (Sowa et al., 2009). The new weights for the MIST score, MIST threshold and Comppass threshold were derived by testing the prediction performance of the top 10 optimal weight combinations, trained on two thirds of a benchmark set containing 5200 interactions (52 positive interactions and 5148 negative interactions randomly sampled from the mass-spectrometry results). The prediction performance was tested on a validation set composed of the remaining one third of 5200 benchmark interactions. To explore many putative score configurations, an exhaustive grid search was performed on the 4-dimensional vector described by the 3 weight variables and a threshold variable. The domain of these variables was limited to the discrete range between 0 and 1, with 0.01 increments. The sum of the three weight variables was constrained to 1. For every complete assignment of the variable vector, the True Positive Rate (TPR) and False Positive Rate (FPR) were computed to plot a Receiver Operating Curve (ROC) on the validation set. Both the ROC curve and the F1-score, the harmonic mean of precision and sensitivity, were used to select the optimal combination of MIST weights, MIST threshold and Comppass threshold. The refined interactome was compiled through selecting bait-prey pairs with a retrained MIST score > 0.68, using new weights for reproducibility (.36), abundance (.09) and specificity (.55), or a top 1% Comppass WD score per bait. The final iteration of the HCV-interactome was visualized as network representations using Cytoscape, version 2.8.3 (Smoot et al., 2011).

### **Functional and domain ontology enrichments**

For each bait, the average MIST score of terms (GO-BP, GO-MF, KEGG, PFAM and Uniprot), that have at least one associated protein interacting with the bait, was compared to a distribution of averages taken from randomly sampled protein-term associations of the same size. The p-value that the actual term score is higher than the distribution of sampled scores was computed by the one-tailed cumulative normal distribution test. All the p-values were adjusted for multiple hypotheses testing by applying the Benjamini-Hochbach correction to obtain q-values. Terms with q-values < 0.05 were reported as output and visualized as heat maps using the R package. GO-BP, GO-MF and KEGG terms were joined into a functional ontology. PFAM and Uniprot terms were joined into a domain ontology. (Table S7).

### **Lentivirus Production and Transductions**

Lentiviral particles were produced as described (Lai and Brady, 2002). Briefly, 293T cells were co-transfected with the transfer plasmid encoding shRNA constructs, an HIV-based packaging construct (pCMVΔR8.91), and a construct expressing the glycoprotein of vesicular stomatitis virus (VSV-G) (pMD.G). Culture supernatants containing pseudotyped lentiviral particles were stored at -80°C. Cells were transduced in the presence of 8 µg/ml Polybrene (Sigma) for 24 hours at 37°C.

### **In Vitro Transcription of HCV RNA, Electroporations, and HCV storage**

Plasmids encoding HCV reporters were *in vitro* transcribed using the MegaScript T7 kit (Ambion) according to the manufacturer's protocol. For RNA electroporation, Huh7.5 cells were trypsinized, washed once in Opti-MEM (Invitrogen) and resuspended in Cytomix buffer (120 mM KCl, 5 mM MgCl<sub>2</sub>, 0.15 mM CaCl<sub>2</sub>, 2 mM EGTA, 1.9 mM ATP, 4.7 mM GSH, 25 mM HEPES, 10 mM potassium phosphate buffer, pH 7.6) at 10<sup>7</sup> cells ml<sup>-1</sup>. 400 µl of the cell suspension was mixed with 10 µg of HCV RNA and pulsed at 260 V and 950 microfarads with the Gene Pulser II (Bio-Rad) and incubated for 6 days at 37°C. Using this method, we obtained a supernatant with

~10,000 focus-forming units (ffu)/ml. Freezing of HCV particles is challenging and usually associated with a dramatic loss in infectivity of the viral stock. However, following a protocol by Yi, M. (Yi, 2010) we froze our viral stocks at -80°C with 20% fetal bovine serum (FBS), which preserves infectivity after one freeze-thawing cycle to almost 100%.

### **HCV Infections and Replicon Experiments**

Following lentiviral infection, host protein-depleted Huh7.5 cells were split into 48-well plates at two different cell densities of 10,000 and 20,000 cells/well in triplicates. Scramble shRNA-transduced cells were seeded at varying cell densities of 1000 to 40,000 cells/well to generate a standard curve of infection (see main text). Cells were infected with a monocistronic infectious clone of HCV<sub>Jc1</sub> encoding orange fluorescent protein (OFP) and a blastocidin-resistance gene (BSD) at an MOI of 0.03 or 0.06. The OFP-Bsd fusion protein is excised after infection and functions as a fluorescent marker for infected cells and a resistance gene to select for infected cells. Following infection with HCV, cells received fresh media 1 day and 4 days post HCV infection. After 6 days of infection, the cells were washed with PBS, detached by adding 200 µl of trypsin, and fixed with 200 µl of 4% paraformaldehyde and analyzed by flow cytometry. The standard curve was used to determine an expected infection rate given the cell density for each sample and the ratio of actual vs. expected rate of infection was generated. A 25% decrease (<0.75) or increase (>1.25) in the ratio as compared to the scramble controls indicated a phenotype for a given sample. HCV infections to analyze levels of nonsense-mediated decay substrates were conducted with two additional virus constructs: an untagged Jc1 virus and a super-infectious monocistronic Jc1 virus (Jc1/<sup>NS5AB-OFP-Bsd</sup>) that has been previously described (Webster et al., 2013). For HCV replicon experiments, Huh7.5 cells were electroporated with monocistronic Jc1 HCV as described above but with a deletion of the E1 and E2 genes Jc1<sup>ΔE1E2/NS5AB-OFP-Bsd</sup>. Cells were selected with blasticidin for one week to obtain a replicon-expressing cell line.

## Quantitative RT-PCR

The SYBR green qPCR reactions contained 5 µl of 2x Maxima SYBR green/Rox qPCR Master Mix (Thermo), 5 µl of diluted cDNA, and 5 pmol of both forward and reverse primers. The reactions were run using the following conditions: 50°C for 2 min, 95°C for 10 mins, followed by 40 cycles of 95°C for 5 secs and 60°C for 30 secs.

| Primers for qPCR |                         |                         |
|------------------|-------------------------|-------------------------|
| Gene             | Forward primer          | Reverse primer          |
| 18S rRNA         | AACCCGTTGAACCCCAT       | CCATCCAATCGGTAGTAGCG    |
| HCV CORE         | ATCCCTAAAGATCGGCGCTCCAC | AGCCGCACGTTAGGGTATCGATG |
| AASDHPPT         | TGGCTGGTCTGCTGATGATAA   | TCGGGTAAGGATTCGATGAGT   |
| ACTG1            | CCGAGCCGTGTTTCTTCC      | GCCATGCTCAATGGGGTACT    |
| ADE2             | TTGCAGAAGAATAGCAACTGGTT | CACTGTGGGTCATTATTGGCAT  |
| AIMP1            | GGTACTCCACTGCACGCTAAT   | CCAGAAGATACGGTTGTTACTGC |
| AMBP             | CTCTCGGATCTATGGGAAGTGG  | CGTGCTCACTGTCATCCTGTC   |
| ANKRD28          | AATTGCTTGTGTGCGATGGAG   | TAGCAGGCTACATGAAGAGGT   |
| ARIDRA           | ACCACGGCGACTGGACTTA     | CACAGGTGTCCCTCGCTTC     |
| ARL8B            | CATCGCGTCAGGTCAATTCAAG  | GTTGTCTCTCTATGTCCCAGA   |
| ASNS             | GGAAGACAGCCCCGATTTACT   | AGCACGAACTGTTGTAATGTCA  |
| AT2C1            | TGATGATGCCGTCAGTATCACT  | CCTTCACGCACACAATGGC     |
| BAG6             | AGTGTCCACGCATCCGTAG     | CCCAAACAGTGAGTTTCTGAGG  |
| BIN1             | TGAGCAGTGCGTCCAGAATTT   | CGATCTTGTGGCTCATCCC     |
| CAD              | AGTGGTGTTCAAACCGGCAT    | CAGAGGATAGGTGAGCACTAAGA |
| CARS             | CCATGCAGACTCCACCTTTAC   | GCAATACCACGTCACCTTTTTTC |
| CHCHD2           | ACACATTGGGTCACGCCATTA   | GCACCTCATTGAAACCCTCACA  |
| CHCHD3           | GAGGCGGACGAGAATGAGAAC   | ACCAGAATACCGCTGAGACTTC  |
| CLEC16A          | ATGGCAAGACTTCCCGCAA     | CACGTAACGGCCCGACTTTT    |
| COG1             | GCCGAGATCGAGCACAAGAA    | GGCAGCCATGCTGTAGAACT    |
| COG3             | AGAAAGAATTGAAACCGCACAGC | GCTTCATGTAGGGTTCTGTCT   |
| COG8             | CGACTTGGCCTTCGCTAACTA   | TAGGGTCAGGCTATTCATCCG   |
| CSNK2A1          | GGTGAATGGGAAATCAAGAT    | TGATGATGTTGGGACCTCCTC   |
| CW19L2           | AGTGGTAGATTTGAAAGTGCGAA | AGCATCCATGTATCCTCACCC   |
| CYB5B            | ATGTCCGGTTCAATGGCGAC    | CATGGATCACAAGCCACAGTT   |
| DDX1             | TCTCCGAGATGGGTGTAATGC   | ACCTCCTCCTAAGATCAATGGG  |
| DDX21            | GAGGAGCCATCTCAAATGACA   | GGGTTACAGTCCGGTTCAGG    |
| DDX3X            | AGCAGTTTTGGATCTCGTAGTG  | ACTGTTTCCACCACGTTCAAAT  |
| DDX52            | ACGTCCACGATCTCTTTCGC    | TGAAGCACCTCCGAAGAATCA   |
| DECR1            | TCTTCAAAAAGCGATGCTACCA  | CTATCACGCACTGAGCACCT    |
| DERL2            | TTTTTGGGCCAGTTGGATTCA   | GCTCCACACATAGACGAGCATTA |

|                        |                            |                          |
|------------------------|----------------------------|--------------------------|
| DGAT1                  | TATTGCGGCCAATGTCTTTGC      | CACTGGAGTGATAGACTCAACCA  |
| DNAJB11                | AACCTGAGCACCTTTTGCT        | GGTTCCGGTCGGGATGAAG      |
| DNAJB4                 | GCAGGAGGTACTGATGGACAA      | ACCACCCATTGCTCTTCCAAA    |
| DNAJC7                 | AGCTATTATGGTAATCGAGCAGC    | CTTCCCGGAACCTTCCAAGC     |
| DOCK9                  | TGTCATCGTCCAGAAGAAGACT     | TCTCAGGATGGCCGTCTGAAA    |
| EMID2                  | CTGCGCCAACCTCGTAAGG        | TTCCTCATCACAGTTGCTCCC    |
| F213A                  | ATGGGGATGTGGTCCATTGG       | GCACGGCCATAATCACAGC      |
| FNDC3B                 | TCTCGTTCAAGTTAATCCAGGTG    | ACATGGCTGAGGGGTAGCTT     |
| FXR2                   | GGGCCTTCTACAAGGGCTTTG      | TCTCTCACTCTGCCAGTTGTT    |
| GAPDH                  | TGCCAAATATGATGACATCAAGAA   | GGAGTGGGTGTCGCTGTTG      |
| GCSH                   | GGAAGCGTTGGGAGATGTTGT      | TCTGAAGGGTTACTCAGTGTC    |
| GGCX (VKGC)            | ATGGTGCTAGACATTCCCCAG      | GATACATCCAGTCAAGTGGCAG   |
| GNG12                  | AGCAAGCACCAACAATATAGCC     | AGTAGGACATGAGGTCCGCT     |
| GNG5                   | CAACCGCGTAAAAGTTTCCCA      | GGGTCATGTTGAGCATTCTGC    |
| GOLGA2                 | CCC CGCATGTCGGAAGAAA       | GCATTGTCCTTGGGTGTATCCT   |
| GPR89C                 | TGACTCTCATGGCTCTTCTTTC     | ATATCCGTGTCAGTCACATTCC   |
| HCCS                   | ATGAAAGGCTGTCCAGTGAATAC    | GGTGGCATCAGATTTGAAGGAT   |
| HNRNP2                 | AGTGATGCGCTTCTTCTCTGA      | TTCGGACCTGTATGCTTCAAC    |
| HPRT1                  | CCTGGCGTCGTGATTAGTGAT      | AGACGTTCAAGTCTGTCCATAA   |
| HSD17B10               | TGGCGGTAATAACCGGAGGA       | ACAGTTGACAGCTACATCCACA   |
| IFT88                  | GGGTCCAAGACATCTCTGGC       | CATGGGTCTAGTAACTCCATCCT  |
| IMP3                   | CCCTGACGTGGTTACCGAC        | CCGCTTGATCTTGGACGAGT     |
| KHSRP                  | ATCCGCAAGGACGCTTTTCG       | GGAGTGCTGTTATTCACTGTCCG  |
| LDHA                   | ATGGCAACTCTAAAGGATCAGC     | CCAACCCCAACAACGTAAATCT   |
| LMF2                   | CTCACCTACCACTACGAGACC      | GCACAGCGATCTCAATTAGGAAG  |
| LPCAT1                 | CGCCTCACTCGTCTACTTC        | TTCCCCAGATCGGGATGTCTC    |
| LRC18                  | GCGCCTTAGTGACATGGAC        | GGCAGCTTGCTATGTAGTTGC    |
| LRRC59                 | TGACTACTCTACCGTCGGATTT     | TTCAGGTCCAACCACTTCAGG    |
| LUC7L                  | ACGGAGATACAACCTCGTCAACG    | AGGTGACTCTTGCACTACTCTGT  |
| Marcks-related protein | CAAGGGTGAAGGGGAGTCCG       | GACAGGCCGCTCAATTTGAAA    |
| MCM2                   | ATGGCGGAATCATCGGAATCC      | GGTGAGGGCATCAGTACGC      |
| MAGOH                  | TTTATCTGCGTTACTACGTGGGG    | CGTCCGGTCGAAACTCAAAC     |
| MIF                    | ATCAGCCCGGACAGGGTCTACATCAA | TTAGGCGAAGGTGGAGTTGTTCCA |
| MOGS                   | CCGGGGACTCCTAAGCTCA        | CCTCTTGACGAACTCAGTGGT    |
| MRS2                   | ACTTAGAGCAATGGCTGTTCC      | GCATCCAAGGTCTCAAGGATCAG  |
| MSI2H                  | ACCTCACCAGATAGCCTTAGAG     | AGCGTTTCGTAGTGGGATCTC    |
| MTX2                   | GCCTTCGTCTCCAGATTGC        | AGAGAAGCTGCATTGTCAGAAAG  |
| NAP1L1                 | AAAGCACGTCAGCTAACTGTT      | TTGAGAGCATTCACTCGTCTTTT  |
| NAP1L4                 | TCCAGCTACATCGAACTTTACC     | ACATCGCCGGTGATAAATTCTC   |
| OAT                    | GTGGGGCTATACCGTGAAGG       | TGGTCCAAAACCATCGTAACTG   |
| PEF1                   | AGGGCAGTATGGTAGTGGG        | GGCACCGTAGGAACTTGGA      |
| PEG10                  | AGCAGTCGGAGGAGAACAAC       | CACTGGGCCATGAAAGGAG      |



|            |                             |                          |
|------------|-----------------------------|--------------------------|
| PIGS       | GCGGCTACACACCTAGAGG         | CTGGGAGTAAGGCAACGAGG     |
| PP2AB      | CTGAACGAGAACCAAGTGCG        | ACGAACCTCTTGACATTTGA     |
| PPIA       | CCCACCGTGTTCCTTCGACATT      | GGACCCGTATGCTTTAGGATGA   |
| PRDX1      | CCACGGAGATCATTGCTTTCA       | AGGTGTATTGACCCATGCTAGAT  |
| PHB2       | GTGCGCGAATCTGTGTTTAC        | GATAATGGGGTACTGGAACCAAG  |
| PSMA5      | TGCCATGAGTGGGCTAATTG        | GGCACCTGGATCTGCATCTT     |
| PSMC3      | CGAGCAAGATGGAATTGGGGA       | GCTCATGGGTGACTCTCAACA    |
| PSME2      | GCAAGAGGACTCCCTCAATGT       | CTTCTGGCTTAACCAGGGCA     |
| Rab5C      | CCGCTTTGTCAAGGGACAGTT       | AGGCTGTGATACCGCTCCT      |
| RAP2C      | TCTACCGCAAAGAGATCGAAGT      | ACCTTGGCCGTTTTTGTATGA    |
| RM22       | CGAGGAATGTCTATTGACCAGGC     | CGGATGCGTTTCAGGCACT      |
| RNF5       | GCCAGAACGGCAAGAGTGT         | GGCTCCCTCGCCATAAAG       |
| RPA1       | GGGGATACAAACATAAAGCCCA      | CGATAACGCGGCGGACTATT     |
| RPA3       | AGCTCAATTCATCGACAAGCC       | TCTTCATCAAGGGGTTCCATCA   |
| RPLP1      | AGCCTCATCTGCAATGTAGGG       | TCAGACTCCTCGGATTCTTCTTT  |
| RRP1       | CAGGTGGTTTTACGCACGAC        | GAACGAGCTGGGAAATAGTCC    |
| RT18C      | GTTTGCGGTGGTCTAGGGAG        | TGCTGGATACCTGTTGTGAAC    |
| RTN3       | ACTGGGTTTGTCTTTGGCAC        | ATGACGGACTTGTAGATCCTGA   |
| RUVBL1     | AGGTGAAGAGCACTACGAAGA       | CTACTATGACGCCACATGCCT    |
| RUVBL2     | AAGTCCCGGAGATCCGTGAT        | CACCGATTGCTCAATCCTTG     |
| SACM1L     | GCTGAAGCTGCATATCACACC       | ACGGTCAATGGTAAGTACGTCA   |
| SC35-1.6kb | CGGTGTCCTC TTAAGAAAATGATGTA | CTGCTACACA ACTGCGCCTT TT |
| SCAMP3     | AGGAGTTGGACCGAAGGGAG        | GGCAGCGGAGGAAGTTTCAAG    |
| SCMC1      | GGTGTCTGTCTCTCGAACAAG       | CATCTGTGCGAAAGCCACCAAA   |
| SEC63      | TCGTGATCCCGGCGACATA         | AAACGATACCACATACACCTTCC  |
| SHRPN      | GGGGCGGTTAATTTGGAGTG        | CTCGGACTAGGACTGCCCA      |
| SLC16A1    | AGGTCCAGTTGGATACACCCC       | GCATAAGAGAAGCCGATGGAAAT  |
| SLC25A12   | TCAAGGTGCAGACAACCTAAGC      | GGGGTCATATAACGCTCTCCA    |
| SLC25A24   | GGTGTCTGTCTCTCGAACAAG       | CATCTGTGCGAAAGCCACCAAA   |
| SSBP1      | TGAGTCCGAAACAACCTACCAGT     | CCTGATCGCCACATCTCATTAG   |
| STX18      | ATCACGCTGCTATTCCGGG         | TCCTCCCATATTCAGACATGGT   |
| TBRG4      | CAGCTCACCTGGTAAAGCGAT       | GGGAGTAGATGCTCGTTCCTTC   |
| TCP ALPHA  | CCAGCCACGCTATCCAGTC         | TCAAGGCAAGCAATTTTTGCAT   |
| TCP BETA   | ATTGGAGACTTGGTAAAGAGCAC     | TCTCGTCCACTGCTTAGAAGA    |
| TCP DELTA  | ATGCCCGAGAATGTGGCAC         | GCTTGTGCGGGTCTGATAG      |
| THOC3      | TCGGGGTCTTCGACAAGA          | CTGGTCCACACTATCCCAT      |
| Timm13     | CAGAGGATGACGGACAAGTGT       | CATGTAGCGGTCCATGCACA     |
| TM9S4      | GATTGGTTGCCGTGGTCTTTA       | TTCTACGGGATCGTTCTGGTG    |
| TMPO       | CCCCTCGGTCTGACAAAAG         | CGCTCTTCGCTACTGGAGAA     |
| TMX3       | GGGCCTTCTACAAGGGCTTTG       | TCTCTACTCTGCCAGTTGTT     |
| TNPO1      | CTGTGAGGGAGCATTTGGTG        | TGTGCAACATTAGAGCTTGAGTC  |
| TRX5       | CAACAGAGGGAACAGGAACGA       | CCAGGTCATTCCAAGTCGGC     |
| UBE2G2     | ATCTACCCTGATGGGAGAGTCT      | CTCCACTTTCGTCATTGGGC     |

|       |                         |                          |
|-------|-------------------------|--------------------------|
| UBE2O | ACTAGAGGACCGTTCTGTGGT   | TGACGGGATAGATGATGCAGTT   |
| UBE2S | ACAAGGAGGTGACGACACTGA   | CCACGTTCCGGTGGAAGAT      |
| UBL4A | AGATGGGAAACGACTCTCGGA   | CCACTAGGTTGAGCTTGGAGTT   |
| UBR5  | GTCCATCCATTTCTGTGGTTCA  | CCAATCCAATCTGTCTGGCTG    |
| UPF1  | ACCGACTTTACTCTTCTAGCC   | AGGTCCTTCGTGTAATAGGTGTC  |
| UPF2  | GGAGAAAACACCTAACATCACCA | CCTTGTCAGTGAAAATCCCAACT  |
| USP19 | AAAGTGCAAACCCGCAAGG     | AGTTCAGCGGTGGTATGCAAA    |
| VAPA  | AGATCCTGGTCTCGATCCG     | TTTTCTATCCGATGGATTTTCGCA |
| VAPB  | AGATGGACTGCGGATGAGGAA   | CAGTTGGGGCTAATGCTGAAA    |
| VCP   | GCCGATTCAAAAGGTGATGACC  | CGATTGGGACGGTTCTTCTGT    |
| VDAC1 | ACGTATGCCGATCTTGGCAAA   | TCAGGCCGTA CT CAGTCCATC  |
| VDAC2 | GGCGTGGAATTTTCAACGTCC   | AGACCATACTCACACCACTTGTA  |
| WDR18 | TCGTGTGGGAACTTCACTCG    | CATTGGGTGATGCAGTCAGAC    |
| WIBG  | GGCAAGTATATCGCGTCAACA   | TTCAGGTTACGTTTGGCTGTC    |
| XKR7  | GCGCTGCTCGTGTTCTTCT     | CGAGTAGTCGTAGACGAACCA    |
| YWHAQ | AGGGTCATCTCTAGCATCGAG   | CCACTTTCTCCCGATAGTCCTT   |
| ZW10  | ATGGCCTCGTTCGTGACAG     | CAGATAGCTTATCCACCTGGGTA  |

## Immunoprecipitations and Western Blots

Cells were lysed in RIPA buffer (50mM Tris-HCl, pH 8, 150mM NaCl, 1% NP-40, 0.5% sodium deoxycholate, 0.1% SDS, supplemented with protease inhibitor cocktail (Sigma)) or IP Buffer (150mM NaCl, 50mM Tris pH 7.4, 1mM EDTA, 0.5% NP-40 substitute, supplemented with protease inhibitor cocktail (Sigma)) for 30 min at 4°C and passed 10 times through a G23 needle. Clarified lysates were immunoprecipitated with Flag M2 agarose (Sigma) or HA agarose (Sigma) overnight, washed four times in lysis buffer, and resuspended in Laemmli buffer for SDS-PAGE. For immunoprecipitations of endogenous WIBG in HCV-infected, antibodies recognizing WIBG were incubated with lysates at 4°C overnight. To precipitate antibody-protein complexes, we added 50ul of a Protein A/G agarose slurry and eluted as above. For chemiluminescent detection, we used ECL and ECL Hyperfilm (Amersham).

**Antibodies** The following primary antibodies were used:  $\alpha$ -flag (F7425, Sigma),  $\alpha$ -COXIV (ab16056, Abcam),  $\alpha$ -calreticulin (SPA-600, Stressgen),  $\alpha$ -V5 (A190-120A, Bethyl),  $\alpha$ -Strep-tag II (ab76949, Abcam),  $\alpha$ -CYB5B (HPA007893, Sigma),  $\alpha$ -tubulin (ab15246, Abcam),  $\alpha$ -HA

(11867423001, Roche),  $\alpha$ -WIBG (SAB1103121, Sigma),  $\alpha$ -WIBG (70R-10101, Fitzgerald)  $\alpha$ -Magoh (sc-271365, Santa Cruz Biotechnology Inc.), and  $\alpha$ -RBM8A (Y14) (HPA018403, Sigma),  $\alpha$ -VAPA (A304-366A, Bethyl Laboratories, Inc.),  $\alpha$ -NS5A (HCM-131-5, Austral Biologicals).

### **Mitochondrial Enrichment**

Mitochondria were isolated from HEK293T cells using the Mitochondrial Isolation Kit for Cultured Cells and lysis of cells was done with 10  $\mu$ l Reagent B. Cellular debris was removed by two sequential centrifugations at 700 x *g* for 10 minutes at 4°C, discarding the pellet after each spin. Mitochondria were pelleted by centrifugation at 3,000 x *g* for 15 minutes at 4°C. The pelleted mitochondria were washed, resuspended in 100 $\mu$ l of Reagent C. Supernatants were cleared of mitochondrial contamination by two sequential centrifugations at 12,000 x *g* for 15 minutes at 4°C, reserving the supernatant as the cytoplasmic fraction.

### **Mitochondrial Viability Assays**

For mitochondrial factors influencing HCV infection, we selected the two shRNAs yielding the most significant alteration of HCV infection. Following lentiviral infection, host protein-depleted Huh7.5 cells were plated in triplicate in 96-well plates at a density of 40,000 cells per well. For the alamar blue assay, cells were incubated with 200 $\mu$ l alamar blue reagent and percent reagent reduction was calculated according the manufacturers intructions (Thermo Scientific alamarBlue Cell Viability Assay Reagent, Cat.# 88951). For the CMXRos assay, cells were incubated in DMEM containing 200nM CMXRos for 30 minutes at 37°C. Cells were washed with PBS, trypsinized and transferred to a 96-well V-bottom plate, then pelleted and resuspended in PBS. Mean fluorescence intensity was measured by flow cytometry. For both assays scramble shRNA was used as a negative control and CCCP at a final concentration of 50 $\mu$ M was used as a positive control.

## Supplemental References

Choi, M., Chang, C.Y., Clough, T., Broudy, D., Killeen, T., MacLean, B., and Vitek, O. (2014).

MSstats: an R package for statistical analysis of quantitative mass spectrometry-based proteomic experiments. *Bioinformatics* 30, 2524-2526.

Cox, J., and Mann, M. (2008). MaxQuant enables high peptide identification rates, individualized p.p.b.-range mass accuracies and proteome-wide protein quantification. *Nat Biotechnol* 26, 1367-1372.

Jager, S., Cimermancic, P., Gulbahce, N., Johnson, J.R., McGovern, K.E., Clarke, S.C., Shales, M., Mercenne, G., Pache, L., Li, K., *et al.* (2011). Global landscape of HIV-human protein complexes. *Nature* 481, 365-370.

Lai, Z., and Brady, R.O. (2002). Gene transfer into the central nervous system in vivo using a recombinant lentivirus vector. *J Neurosci Res* 67, 363-371.

Li, M.Z., and Elledge, S.J. (2012). SLIC: a method for sequence- and ligation-independent cloning. *Methods Mol Biol* 852, 51-59.

Smoot, M.E., Ono, K., Ruscheinski, J., Wang, P.L., and Ideker, T. (2011). Cytoscape 2.8: new features for data integration and network visualization. *Bioinformatics* 27, 431-432.

Sowa, M.E., Bennett, E.J., Gygi, S.P., and Harper, J.W. (2009). Defining the human deubiquitinating enzyme interaction landscape. *Cell* 138, 389-403.

Webster, B., Ott, M., and Greene, W.C. (2013). Evasion of superinfection exclusion and elimination of primary viral RNA by an adapted strain of hepatitis C virus. *J Virol* 87, 13354-13369.

Yang, X., Boehm, J.S., Yang, X., Salehi-Ashtiani, K., Hao, T., Shen, Y., Lubonja, R., Thomas, S.R., Alkan, O., Bhimdi, T., *et al.* (2011). A public genome-scale lentiviral expression library of human ORFs. *Nat Methods* 8, 659-661.

Yi, M. (2010). Hepatitis C virus: propagation, quantification, and storage. *Curr Protoc Microbiol* Chapter 15, Unit 15D 11.
